- lescent idiopathic scoliosis. *J Spinal Disord Tech* 2009; 22:551-8
23. Yaszay B, Jazayeri R, Lonner B: The effect of surgical approaches on pulmonary function in adolescent idiopathic scoliosis. *J Spinal Disord Tech* 2009; 22:278-83
  24. Lin TC, Huang YS, Lee SC, Ho ST, Cherng CH, Lu CC: Intrapleural misplacement of a thoracic epidural catheter in an anesthetized patient. *Acta Anaesthesiol Taiwan* 2008; 46:49-52
  25. Grieve PP, Whitta RK: Pleural puncture: An unusual complication of a thoracic epidural. *Anaesth Intensive Care* 2004; 32:113-6
  26. Rowley C, Onslow J, Weston A: Hypoglossal nerve palsy, trigeminal nerve palsy and Horner's syndrome in association with epidural block. *Int J Obstet Anesth* 2009; 18: 191-2
  27. Rohrer JD, Schapira AH: Transient Horner's syndrome during lumbar epidural anaesthesia. *Eur J Neurol* 2008; 15: 530-1
  28. Hoftman N, Chan K: Two cases of Horner syndrome after administration of an epidural test dose that did not recur with subsequent epidural activation. *Reg Anesth Pain Med* 2009; 34:372-4

## ANESTHESIOLOGY REFLECTIONS

### W. T. G. Morton's Dana, Maritime Attorney

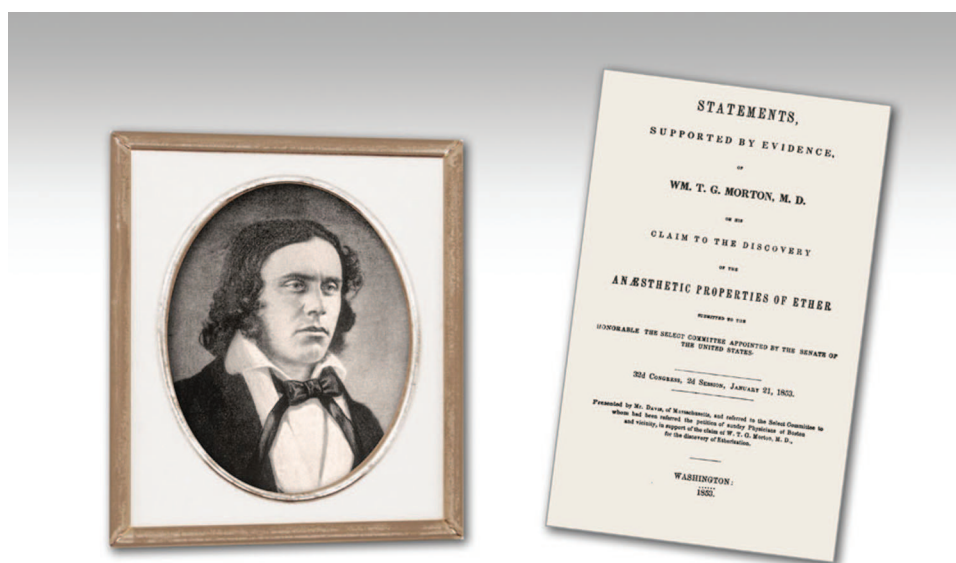

With his vision compromised by measles acquired during his junior year at Harvard, Richard Henry Dana, Jr. (1815–1882, see *above left*) sought relief by sailing from Boston in 1834 around Cape Horn to California and back. He recorded his 2-yr odyssey “before the mast” (*i.e.*, in the seahands’ quarters in the ship’s bow). In 1840 he not only published his diaries as a best-selling book, *Two Years before the Mast*, but also passed the Massachusetts bar. Specializing in maritime law, Dana forsook water for ether by 1853 to serve as an attorney to W. T. G. Morton when the latter sought congressional recognition (see *above right*) for his . . . *Discovery of the Anaesthetic Properties of Ether*. (Copyright © the American Society of Anesthesiologists, Inc. This image appears in color in the *Anesthesiology Reflections* online collection available at [www.anesthesiology.org](http://www.anesthesiology.org).)

George S. Bause, M.D., M.P.H., Honorary Curator, ASA’s Wood Library-Museum of Anesthesiology, Park Ridge, Illinois, and Clinical Associate Professor, Case Western Reserve University, Cleveland, Ohio. [UJYC@aol.com](mailto:UJYC@aol.com).
